# Supplementary material
Source: ML conference proceedings conference paper supplement (https://openreview.net/forum?id=qY7UqLoora)
Supplement: supplementary_material [file attachment]

## Sheet: Sheet1
heads,dims	Init\Seed	0	1	2	4	33	72	Avg	Stdev		95CI
1,64	Xav	84.1	84.7	85.4	85.2	85.1	85	84.9167	0.462241		0.573856
1,64	Bal_X	84.3	84.2	85.1	84.6	85	84.4	84.6	0.374166		0.464514
1,64	Bal_O	84.8	84.4	84.7	84.3	84.4	84.1	84.45	0.258844		0.321345
8,8	Xav	84.1	84.8	84	85.1	84.6	84.4	84.5	0.419524	Test.Acc.	0.520824
8,8	Bal_X	84.8	84.4	84.6	84.5	83.8	85.4	84.5833	0.523132		0.64945
8,8	Bal_O	84.6	84	85	84.2	84.7	84.8	84.55	0.378153		0.469464
8,8	Xav	621	560	513	582	723	544	590.5	74.3741	Mod.Eval.	92.3328
8,8	Bal_X	624	526	655	577	406	482	545	92.7534		115.15
8,8	Bal_O	624	597	648	503	576	543	581.833	53.1843		66.0264
